# Supplementary figures and images for: Formononetin regulates endothelial nitric oxide synthase to protect vascular endothelium in deep vein thrombosis rats
Source: PubMed Central journal article supplement — Int J Immunopathol Pharmacol. 2022 Jun 22;36:03946320221111117. doi: 10.1177/03946320221111117 (PMC9228649; doi:10.1177/03946320221111117), 2022-06-22

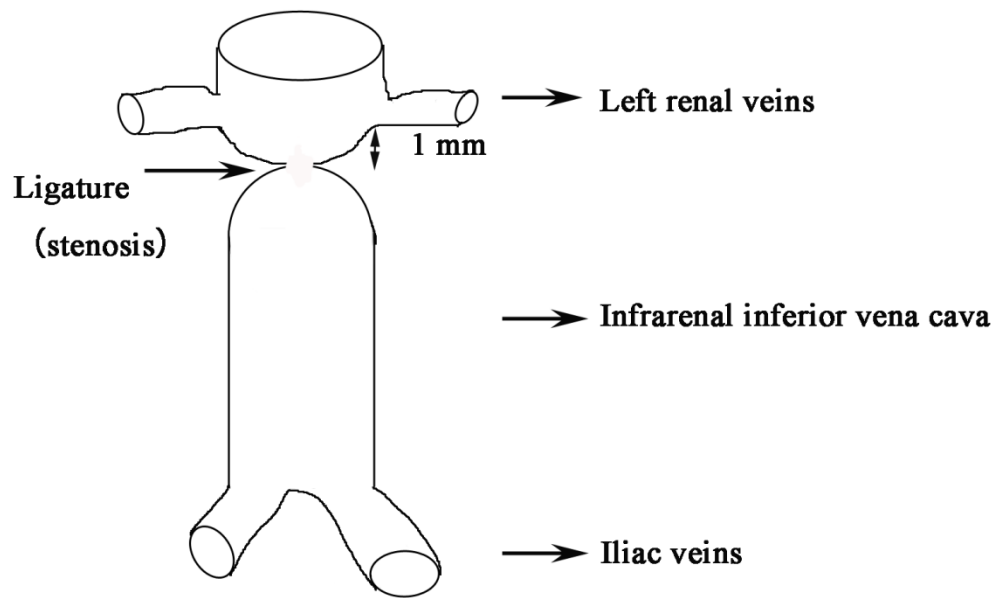

Figure S1. The diagram of an inferior vena cava (IVC) stenosis-induced DVT rat model.

Supplement: sj-pdf-1-iji-10.1177_03946320221111117.pdf [file sj-pdf-1-iji-10.1177_03946320221111117.pdf]
